# Supplementary material
Source: publisher figshare collection journal article supplement (https://sage.figshare.com/ndownloader/files/14885060)
Supplement: Supplementary file 1 [file 14885060]

Appendix Table 1: Correlation between random effects for the discrete choice and time trade-off preferences with original priors and flattened priors

|  | Modelled Jointly – flattened priors | | | | | Modelled Jointly | | | | |
| --- | --- | --- | --- | --- | --- | --- | --- | --- | --- | --- |
| Regression Coefficients | | Random Effects | |  | Regression coefficients | | Random Effects | |  |
| Estimate (SE) | | Estimated SD | |  | Estimate (SE) | | Estimated SD | | Estimated  correlation  (95% CrI) |
| TTO | DCE | TTO | DCE |  | TTO | DCE | TTO | DCE |
| **Intercept** | 1.132 (0.016) | -0.126 (0.040) | 0.073 | 0.34 | -0.090  (-0.43, 0.33) | 1.132 (0.015) | -0.129 (0.040) | 0.074 | 0.34 | -0.062  (-0.43,0.31) |
| **Mobility** | -0.034 (0.005) | -0.318 (0.046) | 0.047 | 0.35 | 0.17  (-0.02, 0.34) | -0.034 (0.005) | -0.318 (0.048) | 0.047 | 0.33 | 0.16  (-0.04, 0.36) |
| **Self-Care** | -0.049 (0.004) | -0.281 (0.045) | 0.052 | 0.36 | 0.27  (-0.11, 0.44) | -0.049 (0.004) | -0.283 (0.046) | 0.052 | 0.35 | 0.28  (0.09, 0.45) |
| **Usual Activities** | -0.015 (0.005) | -0.197 (0.045) | 0.042 | 0.36 | 0.077  (-0.11, 0.27) | -0.015 (0.005) | -0.198 (0.044) | 0.042 | 0.35 | 0.070  (-0.13, 0.26) |
| **Pain/Discomfort** | -0.048 (0.005) | -0.469 (0.048) | 0.046 | 0.35 | -0.035  (-0.27, 0.18) | -0.048 (0.005) | -0.471 (0.051) | 0.046 | 0.36 | -0.012  (-0.23, 0.21) |
| **Anx/Depression** | -0.040 (0.005) | -0.618 (0.048) | 0.063 | 0.46 | 0.30  (0.13, 0.46) | -0.040 (0.005) | -0.621 (0.051) | 0.063 | 0.46 | 0.31  (0.14, 0.47) |
| **MO45** | -0.063 (0.015) | -0.658 (0.141) | 0.088 | 0.38 | 0.20  (-0.27, 0.61) | -0.062 (0.015) | -0.630 (0.131) | 0.086 | 0.42 | 0.19  (-0.29, 0.58) |
| **SC45** | -0.053 (0.013) | -0.809 (0.155) | 0.086 | 0.31 | 0.17  (-0.28, 0.58) | -0.054 (0.014) | -0.782 (0.148) | 0.086 | 0.39 | 0.18  (-0.29, 0.59) |
| **UA45** | -0.131 (0.015) | -0.736 (0.150) | 0.091 | 0.50 | 0.14  (-0.36, 0.58) | -0.130 (0.016) | -0.713 (0.140) | 0.089 | 0.59 | 0.16  (-0.28, 0.55) |
| **PD45** | -0.133 (0.015) | -1.376 (0.162) | 0.170 | 1.41 | 0.76  (0.61, 0.88) | -0.133 (0.015) | -1.344 (0.160) | 0.169 | 1.42 | 0.75  (0.60, 0.87) |
| **AD45** | -0.146 (0.014) | -0.984 (0.156) | 0.128 | 1.17 | 0.61  (0.36, 0.80) | -0.144 (0.014) | -0.946 (0.153) | 0.125 | 1.12 | 0.61  (0.35, 0.80) |
| **Num45sq** | 0.018 (0.001) | -0.026 (0.036) | 0.027 | 0.11 | 0.016  (-0.13, 0.17) | 0.018 (0.001) | -0.034 (0.033) | 0.027 | 0.12 | 0.010  (-0.14, 0.16) |
